# Supplementary material for: Age‐related changes in hippocampal‐dependent synaptic plasticity and memory mediated by p75 neurotrophin receptor
Source: PubMed Central journal article supplement (PMC7884039; doi:10.1111/acel.13305), 2021-01-15

Figure S1

A

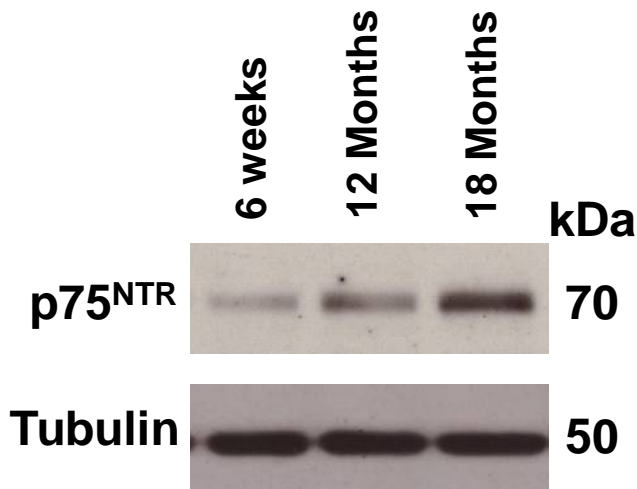

B

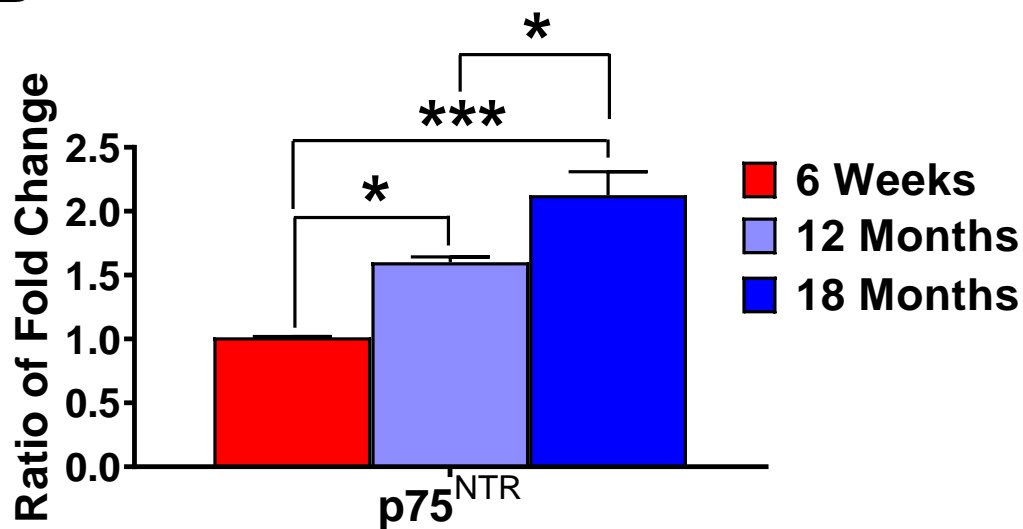

Supplement: ACEL-20-e13305-s001.pdf [file ACEL-20-e13305-s001.pdf]
