# Supplementary material for: Age‐related changes in hippocampal‐dependent synaptic plasticity and memory mediated by p75 neurotrophin receptor
Source: PubMed Central journal article supplement (PMC7884039; doi:10.1111/acel.13305), 2021-01-15
Supplement: ACEL-20-e13305-s002.pdf [file ACEL-20-e13305-s002.pdf]

Figure S2

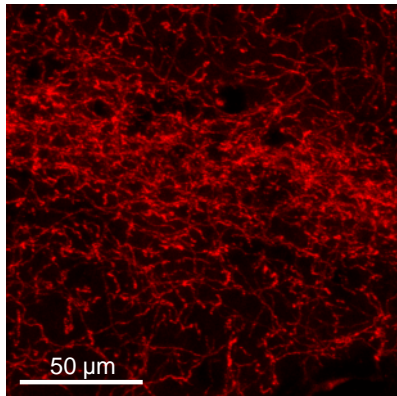

p75<sup>NTR</sup>

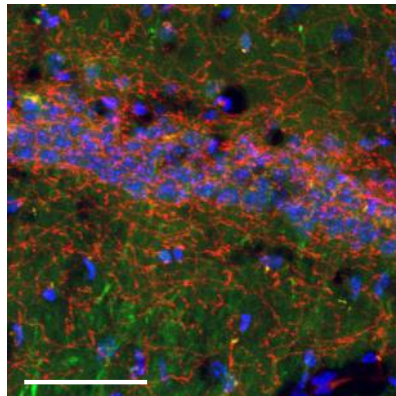

p75<sup>NTR</sup>, MAP2, DAPI

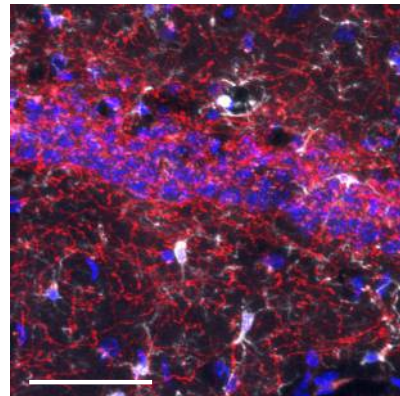

p75<sup>NTR</sup>, Iba1, DAPI
